# Supplementary material for: The signature of NAO and EA climate patterns on the vertical structure of the Canary Current upwelling system
Source: Copernicus journal article supplement (doi:10.5194/os-19-351-2023), 2023-03-30
Supplement: Supplementary file 1 [file os-19-351-2023-supplement.pdf]

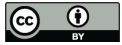

*Supplement of*

## **The signature of NAO and EA climate patterns on the vertical structure of the Canary Current upwelling system**

**Tina Georg et al.**

*Correspondence to:* Tina Georg ([tina.georg@uni-mainz.de](mailto:tina.georg@uni-mainz.de))

The copyright of individual parts of the supplement might differ from the article licence.

## September 1995

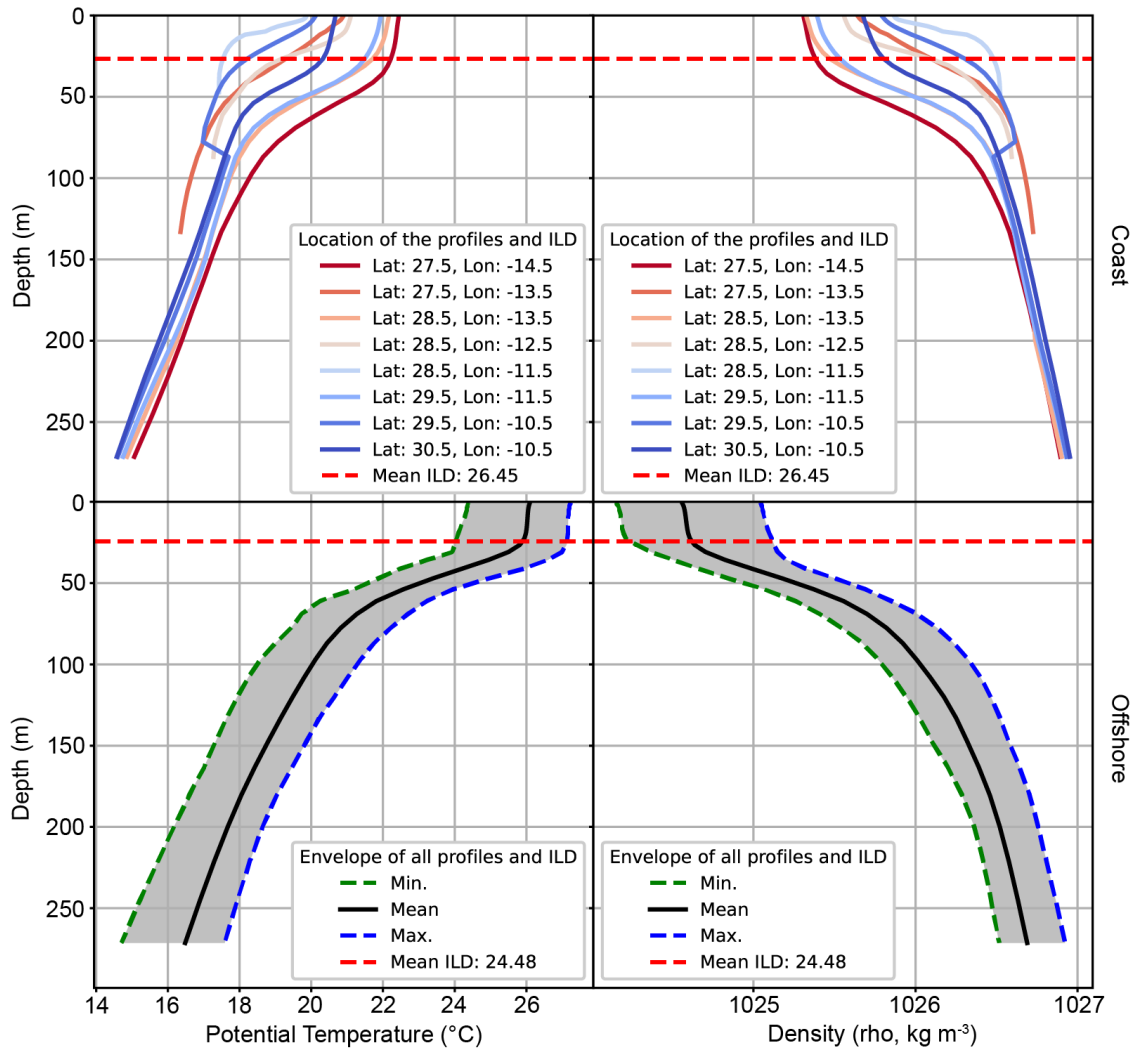

**Supplementary figure: Example of a depth-profile (September 1995) of density and temperature at different latitudes for the coastal and offshore area. For the offshore area, minimum, maximum, and mean values of all profiles have been calculated and plotted in an envelope**
